# Supplementary material
Source: PubMed Central journal article supplement (PMC3141972)
Supplement: 1109368108_pnas.201109368SI.pdf [file 1109368108_pnas.201109368SI.pdf]

# Supporting Information

Prugnolle et al. 10.1073/pnas.1109368108

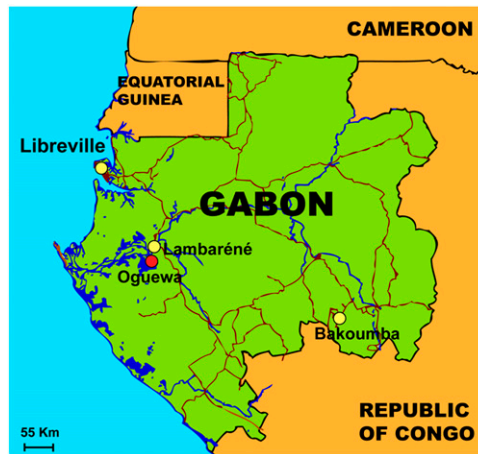

Fig. S1. Map of Gabon with the location of Oguewa (Moyen Ogooué province), the village where the MO454 isolate was discovered.

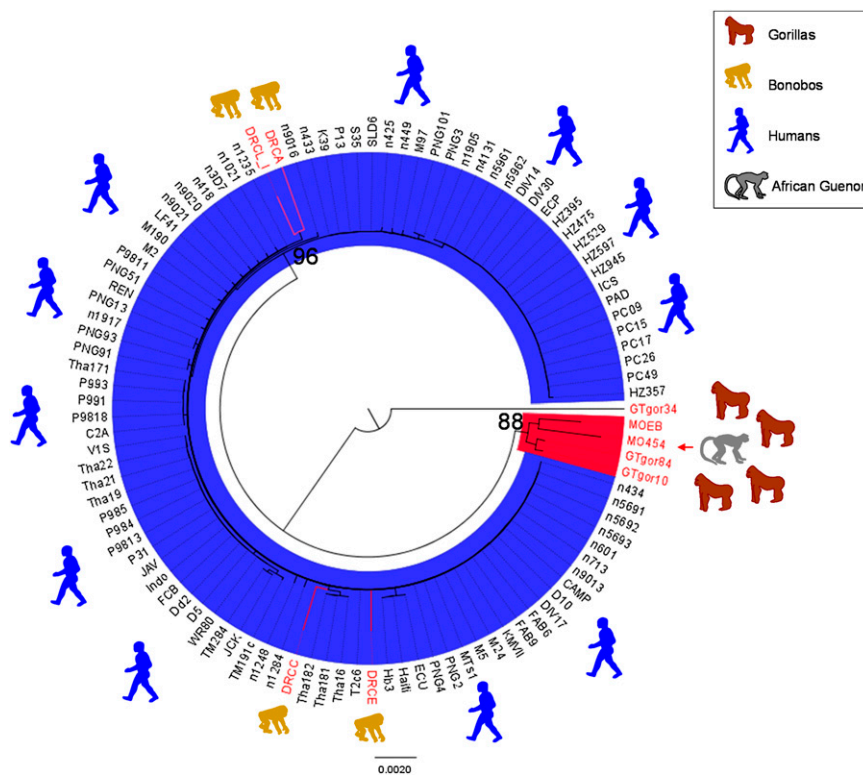

Fig. S2. Phylogenetic position of the *P. falciparum* mitochondrial sequences obtained from nonhuman primates (in red) with a panel of *P. falciparum* mitochondrial sequences obtained from humans collected all over the world (in blue). The human sequences are from Joy et al. (1), chosen to represent the worldwide diversity. The mitochondrial *P. falciparum* sequences from gorillas are from Liu et al. (2) and Prugnolle et al. (3). The ones from bonobos are from Krief et al. (4). The one from the guenon is from this study (MO454 isolate). Bootstrap values (in %) are indicated at the nodes. (Scale bar: 0.0020 substitutions per site.)

- Joy DA, et al. (2003) Early origin and recent expansion of *Plasmodium falciparum*. *Science* 300:318–321.
- Liu W, et al. (2010) Origin of the human malaria parasite *Plasmodium falciparum* in gorillas. *Nature* 467:420–425.
- Prugnolle F, et al. (2010) African great apes are natural hosts of multiple related malaria species, including *Plasmodium falciparum*. *Proc Natl Acad Sci USA* 107:1458–1463.
- Krief S, et al. (2010) On the diversity of malaria parasites in African apes and the origin of *Plasmodium falciparum* from Bonobos. *PLoS Pathog* 6:e1000765.

**Table S1. Characteristics of the microsatellite loci used to genotype the human and nonhuman primate *Plasmodium falciparum* isolates**

| Locus  | Code | Cytologic location | Repeat motif | GenBank accession no. | Ref. |
|--------|------|--------------------|--------------|-----------------------|------|
| POLYa  | 1    | Chr. 4             | (TAA)        | G37809                | 5    |
| TA60   | 2    | Chr. 13            | (TAA)        | G38876                | 5    |
| ARA2   | 3    | Chr. 11            | (TAA)        | G37848                | 5    |
| Pfg377 | 4    | Chr. 12            | (TAA)        | G37851                | 5    |
| PfPK2  | 5    | Chr. 12            | (ATT)        | G37852                | 5    |
| TA87   | 6    | Chr. 6             | (CAA) (TAA)  | G38838                | 5    |
| TA109  | 7    | Chr. 6             | (ACT)        | G38842                | 5    |

5. Anderson TJ, et al. (2000) Microsatellite markers reveal a spectrum of population structures in the malaria parasite *Plasmodium falciparum*. *Mol Biol Evol* 17:1467–1482.

**Table S2. Characteristics of the monoclonal human *P. falciparum* isolates collected in Central Africa and genotyped at seven microsatellites and 96 SNP markers, with their geographical coordinates, total sample size, and monoinfected sample size**

| Country           | Site                                       | Latitude      | Longitude     | Monoinfected sample size | Years of collection |
|-------------------|--------------------------------------------|---------------|---------------|--------------------------|---------------------|
| Cameroon          | Simbock/Tibati                             | 05° 15' 20" N | 11° 41' 55" E | 33 (18)*                 | 2003                |
| Congo Brazzaville | Brazzaville, Gamboma,<br>Pointe Noire, Oyo | 00° 13' 44" S | 15° 49' 45" E | 14 (14)                  | 2005                |
| Gabon             | Near Kango                                 | 00° 08' 49" N | 10° 04' 50" E | 24 (11)                  | 2008                |

\*The first number corresponds to the number of isolates that were characterized at the seven microsatellite markers. Between parentheses is the number of isolates that were genotyped at the 96 SNPs.

**Table S3.** List and characteristics of the 96 single nucleotide polymorphisms (SNPs) genotyped in the primate and human *P. falciparum* isolates

| SNP name               | Chromosome location | Chromosome position, bp | Coding region | Nonsynonymous SNP* |
|------------------------|---------------------|-------------------------|---------------|--------------------|
| CombinedSNP.MAL1.1303  | 1                   | 161748                  | Yes           | Yes                |
| CombinedSNP.MAL1.1698  | 1                   | 248536                  | No            | Null               |
| CombinedSNP.MAL1.2718  | 1                   | 497763                  | Yes           | Yes                |
| CombinedSNP.MAL1.3206  | 1                   | 531995                  | Yes           | Yes                |
| CombinedSNP.MAL1.3532  | 1                   | 552009                  | No            | Null               |
| CombinedSNP.MAL2.1214  | 2                   | 69773                   | No            | Null               |
| CombinedSNP.MAL2.1484  | 2                   | 115160                  | No            | Null               |
| CombinedSNP.MAL2.1674  | 2                   | 161537                  | No            | Null               |
| CombinedSNP.MAL2.1949  | 2                   | 233720                  | No            | Null               |
| CombinedSNP.MAL2.3402  | 2                   | 617743                  | Yes           | Yes                |
| CombinedSNP.MAL2.3551  | 2                   | 660994                  | Yes           | Yes                |
| CombinedSNP.MAL2.4573  | 2                   | 848536                  | Yes           | Yes                |
| CombinedSNP.MAL2.4576  | 2                   | 848602                  | Yes           | Yes                |
| CombinedSNP.MAL3.1167  | 3                   | 93156                   | No            | Null               |
| CombinedSNP.MAL3.2220  | 3                   | 308854                  | No            | Null               |
| CombinedSNP.MAL3.2574  | 3                   | 382195                  | Yes           | Null               |
| CombinedSNP.MAL3.3213  | 3                   | 511564                  | Yes           | Yes                |
| CombinedSNP.MAL3.4573  | 3                   | 889290                  | No            | Null               |
| CombinedSNP.MAL4.5386  | 4                   | 782790                  | Yes           | Yes                |
| CombinedSNP.MAL4.6138  | 4                   | 933313                  | Yes           | Yes                |
| CombinedSNP.MAL4.7161  | 4                   | 1053149                 | No            | Null               |
| CombinedSNP.MAL5.891   | 5                   | 150460                  | No            | Null               |
| CombinedSNP.MAL5.1380  | 5                   | 269459                  | Yes           | Yes                |
| CombinedSNP.MAL5.2309  | 5                   | 482703                  | No            | Null               |
| CombinedSNP.MAL5.3296  | 5                   | 706171                  | Yes           | Yes                |
| CombinedSNP.MAL5.3637  | 5                   | 810754                  | No            | Null               |
| CombinedSNP.MAL5.3953  | 5                   | 958435                  | Yes           | Yes                |
| CombinedSNP.MAL5.4072  | 5                   | 1010769                 | No            | Null               |
| CombinedSNP.MAL6.1877  | 6                   | 490306                  | No            | Null               |
| CombinedSNP.MAL6.1882  | 6                   | 493449                  | Yes           | Yes                |
| CombinedSNP.MAL6.2294  | 6                   | 577117                  | Yes           | Yes                |
| CombinedSNP.MAL6.2893  | 6                   | 708985                  | No            | Null               |
| CombinedSNP.MAL6.3750  | 6                   | 842792                  | Yes           | Yes                |
| CombinedSNP.MAL6.4098  | 6                   | 967410                  | Yes           | Yes                |
| CombinedSNP.MAL6.4671  | 6                   | 1187118                 | Yes           | Yes                |
| CombinedSNP.MAL7.891   | 7                   | 80007                   | No            | Null               |
| CombinedSNP.MAL7.1561  | 7                   | 145765                  | Yes           | Null               |
| CombinedSNP.MAL7.1980  | 7                   | 225283                  | Yes           | Yes                |
| CombinedSNP.MAL7.2307  | 7                   | 307517                  | No            | Null               |
| CombinedSNP.MAL7.6292  | 7                   | 899604                  | No            | Null               |
| CombinedSNP.MAL7.6500  | 7                   | 940111                  | Yes           | Null               |
| CombinedSNP.MAL7.6679  | 7                   | 985641                  | Yes           | Yes                |
| CombinedSNP.MAL7.8102  | 7                   | 1363689                 | Yes           | Yes                |
| CombinedSNP.MAL8.1900  | 8                   | 265780                  | Yes           | Yes                |
| CombinedSNP.MAL8.2514  | 8                   | 423288                  | Yes           | Null               |
| CombinedSNP.MAL8.3796  | 8                   | 562745                  | Yes           | Yes                |
| CombinedSNP.MAL8.4660  | 8                   | 884477                  | Yes           | Yes                |
| CombinedSNP.MAL8.5093  | 8                   | 1006923                 | Yes           | Yes                |
| CombinedSNP.MAL8.5932  | 8                   | 1230413                 | No            | Null               |
| CombinedSNP.MAL8.6021  | 8                   | 1260630                 | No            | Null               |
| CombinedSNP.MAL9.1605  | 9                   | 241196                  | Yes           | Yes                |
| CombinedSNP.MAL9.2173  | 9                   | 417445                  | No            | Null               |
| CombinedSNP.MAL9.2899  | 9                   | 662515                  | No            | Null               |
| CombinedSNP.MAL9.2977  | 9                   | 689167                  | Yes           | Yes                |
| CombinedSNP.MAL9.3236  | 9                   | 771381                  | Yes           | Yes                |
| CombinedSNP.MAL9.4543  | 9                   | 1183700                 | No            | Null               |
| CombinedSNP.MAL9.4694  | 9                   | 1203641                 | Yes           | Null               |
| CombinedSNP.MAL9.4772  | 9                   | 1205590                 | Yes           | Yes                |
| CombinedSNP.MAL10.4242 | 10                  | 1047298                 | Yes           | Null               |
| CombinedSNP.MAL10.4293 | 10                  | 1056776                 | No            | Null               |
| CombinedSNP.MAL10.4821 | 10                  | 1183501                 | Yes           | Yes                |
| CombinedSNP.MAL10.5509 | 10                  | 1378863                 | Yes           | Null               |

**Table S3. Cont.**

| SNP name               | Chromosome location | Chromosome position, bp | Coding region | Nonsynonymous SNP* |
|------------------------|---------------------|-------------------------|---------------|--------------------|
| CombinedSNP.MAL10.6506 | 10                  | 1442930                 | No            | Null               |
| CombinedSNP.MAL11.2867 | 11                  | 580184                  | Yes           | Null               |
| CombinedSNP.MAL11.3166 | 11                  | 657349                  | Yes           | Yes                |
| CombinedSNP.MAL11.5271 | 11                  | 1292301                 | Yes           | Yes                |
| CombinedSNP.MAL12.2258 | 12                  | 95702                   | Yes           | Yes                |
| CombinedSNP.MAL12.2562 | 12                  | 200440                  | Yes           | Null               |
| CombinedSNP.MAL12.2609 | 12                  | 217434                  | Yes           | Yes                |
| CombinedSNP.MAL12.2935 | 12                  | 332820                  | Yes           | Yes                |
| CombinedSNP.MAL12.3474 | 12                  | 532704                  | Yes           | Yes                |
| CombinedSNP.MAL12.3648 | 12                  | 606969                  | No            | Null               |
| CombinedSNP.MAL12.3752 | 12                  | 646259                  | Yes           | Null               |
| CombinedSNP.MAL12.5831 | 12                  | 1162016                 | Yes           | Yes                |
| CombinedSNP.MAL12.9166 | 12                  | 1995202                 | Yes           | Yes                |
| CombinedSNP.MAL13.776  | 13                  | 92674                   | Yes           | Yes                |
| CombinedSNP.MAL13.808  | 13                  | 103054                  | Yes           | Yes                |
| CombinedSNP.MAL13.1518 | 13                  | 256929                  | No            | Null               |
| CombinedSNP.MAL13.1978 | 13                  | 430054                  | No            | Null               |
| CombinedSNP.MAL13.2283 | 13                  | 512792                  | Yes           | Yes                |
| CombinedSNP.MAL13.2992 | 13                  | 815532                  | No            | Null               |
| CombinedSNP.MAL13.3251 | 13                  | 901094                  | Yes           | Yes                |
| CombinedSNP.MAL13.3419 | 13                  | 942637                  | Yes           | Null               |
| CombinedSNP.MAL13.4803 | 13                  | 1399233                 | Yes           | Null               |
| CombinedSNP.MAL13.5081 | 13                  | 1512443                 | Yes           | Yes                |
| CombinedSNP.MAL13.5481 | 13                  | 1624489                 | Yes           | Yes                |
| CombinedSNP.MAL13.5880 | 13                  | 1760453                 | Yes           | Yes                |
| CombinedSNP.MAL13.7227 | 13                  | 2158308                 | Yes           | Yes                |
| CombinedSNP.MAL13.7598 | 13                  | 2306330                 | Yes           | Yes                |
| CombinedSNP.MAL13.8065 | 13                  | 2465780                 | Yes           | Yes                |
| CombinedSNP.MAL13.8177 | 13                  | 2502209                 | No            | Null               |
| CombinedSNP.MAL14.1105 | 14                  | 146706                  | No            | Null               |
| CombinedSNP.MAL14.1712 | 14                  | 406021                  | Yes           | Yes                |
| CombinedSNP.MAL14.1774 | 14                  | 417069                  | No            | Null               |
| CombinedSNP.MAL14.1943 | 14                  | 480286                  | No            | Null               |
| CombinedSNP.MAL14.9817 | 14                  | 3153424                 | Yes           | Yes                |

\*"Yes" means that the nucleotide mutation induces an amino acid change. "Null" means that it does not, either because it is not located in a coding region or because it is a synonymous polymorphism.

**Table S4. Parasite sequences used in Figs. 1 and 4 (with asterisk)**

| Parasite                 | Host                             | GenBank accession no. for Figs. 1 and 4 (with asterisk)                |
|--------------------------|----------------------------------|------------------------------------------------------------------------|
| <i>P. coatneyi</i>       | Asian Old World Monkey           | EU400407                                                               |
| <i>P. cynomolgi</i>      | Asian Old World Monkey           | AY800108                                                               |
| <i>P. fieldi</i>         | Asian Old World Monkey           | AF069615                                                               |
| <i>P. fragile</i>        | Asian Old World Monkey           | AY722799                                                               |
| <i>P. gonderi</i>        | African Old World Monkey         | AY800111                                                               |
| <i>P. hylobati</i>       | Asian Old World Monkey           | AF069618                                                               |
| <i>P. inui</i>           | Asian Old World Monkey           | EU400413                                                               |
| <i>P. knowlesi</i>       | Asian Old World Monkey and Human | NC_007232                                                              |
| <i>P. simiovale</i>      | Asian Old World Monkey           | AY800109                                                               |
| <i>P. sp. DAJ-2004</i>   | African Old World Monkey         | AY800112                                                               |
| <i>P. simium</i>         | New World Monkey                 | AY800110                                                               |
| <i>P. gallinaceum</i>    | Bird                             | NC-008288                                                              |
| Psp. DRC-A               | Bonobo                           | GQ355474*                                                              |
| Psp. DRC-L               | Bonobo                           | GQ355475*                                                              |
| Le/cc                    | <i>Cercopithecus cephus</i>      | JF923754                                                               |
| NGL/ccM                  | <i>Cercopithecus cephus</i>      | JF923758                                                               |
| WN1859/cc                | <i>Cercopithecus cephus</i>      | JF923760                                                               |
| MO454                    | <i>Cercopithecus nictitans</i>   | JF923762*                                                              |
| NGF/cn                   | <i>Cercopithecus nictitans</i>   | JF923756                                                               |
| <i>P. billbrayi</i>      | Chimpanzee                       | GQ355468*                                                              |
| <i>P. billcollinsi</i>   | Chimpanzee                       | GQ355479                                                               |
| <i>P. gaboni</i>         | Chimpanzee                       | FJ895307 update                                                        |
| <i>P. reichenowi</i>     | Chimpanzee                       | AJ251941*                                                              |
| Ddgor3656                | Gorilla                          | HM235366* + HM235367* + HM235368* +<br>HM235194* + HM235195* consensus |
| Dsgor86                  | Gorilla                          | HM235202* + HM235203* + HM235292* consensus                            |
| GTgor10                  | Gorilla                          | HM235206* + HM235273* consensus                                        |
| GTgor118                 | Gorilla                          | HM235211* + HM235369* + HM235370* consensus                            |
| GTgor34                  | Gorilla                          | HM235365* + HM235217* consensus                                        |
| GTgor84                  | Gorilla                          | HM235219* + HM235314* consensus                                        |
| LBgor314                 | Gorilla                          | HM235241* + HM235287* + HM235288* +<br>HM235289* + HM235305* consensus |
| MOEB                     | Gorilla                          | JF923761*                                                              |
| Psp. Gorilla G2          | Gorilla                          | HM235234* + HM235375* consensus                                        |
| Psp. Gorilla G3          | Gorilla                          | HM235216* + HM235376* consensus                                        |
| <i>P. falciparum 3D7</i> | Human                            | AY282930*                                                              |
| <i>P. malariae</i>       | Human                            | AF069624                                                               |
| <i>P. vivax</i>          | Human                            | AY598140                                                               |
| Pf 102-1                 | Human                            | AY282924*                                                              |
| Pf 7G8                   | Human                            | AJ276847*                                                              |
| Pf I1                    | Human                            | AY588279                                                               |
| Pf LF4-1                 | Human                            | AY282975*                                                              |
| Pf M2                    | Human                            | AY282977*                                                              |
| Pf SLD6                  | Human                            | AY283007*                                                              |
| Pf Tha16                 | Human                            | AY283009*                                                              |
| <i>P. ovale</i>          | Human Chimpanzee                 | AB182496                                                               |
| <i>P. ovale variant</i>  | Human Chimpanzee                 | AB182497                                                               |
| 17A2/ms                  | <i>Mandrillus sphinx</i>         | JF923750                                                               |
| Bak/ms1                  | <i>Mandrillus sphinx</i>         | JF923753                                                               |
| Bak/ms2                  | <i>Mandrillus sphinx</i>         | JF923751                                                               |
| BETA/ms                  | <i>Mandrillus sphinx</i>         | JF923749                                                               |
| MoA/msLe                 | <i>Mandrillus sphinx</i>         | JF923752                                                               |
| MOLB                     | <i>Mandrillus sphinx</i>         | JF923755                                                               |
| OLKM/msN                 | <i>Mandrillus sphinx</i>         | JF923759                                                               |
| WN1743/mt                | <i>Miopithecus talapoin</i>      | JF923757                                                               |
| <i>Hepaticystis sp.</i>  | <i>Papio nubensis</i>            | AF069626                                                               |
